# Supplementary material
Source: publisher figshare collection journal article supplement (https://geolsoc.figshare.com/ndownloader/files/22731926)
Supplement: Supplementary file 1 [file 22731926]

## Sheet: Table 1 LaF4
primary standard: temora		comments	206Pb/238U age (207corr.)	+/-1s		206Pb/238U	%rse	age	+/-1s	208Pb/232Th	%rse	age	+/-1s	207Pb/206Pb	%rse	age	+/-1s	207Pb/235U	%rse	age	+/-1s		Nd	+/-1s	Hf	+/-1s	Pb	+/-1s	Th	+/-1s	U	+/-1s		207Pb/235U	+/-1s	206Pb/238U	+/-1s	238U/206Pb	+/-1s	207Pb/206Pb	+/-1s
Extracted zircons
LaF4	AP04d12	ok	234.466	5.50668		0.0372642	0.0235315	235.853	5.45197	0.0129667	0.0248583	260.401	6.43263	0.055654	0.0473965	438.591	105.484	0.293158	0.0484632	261.042	11.2173		2.43115	0.228301	10969.7	626.263	5.15937	0.344681	94.7983	5.96704	125.541	9.05876		0.293158	0.0142074	0.0372642	0.000876882	26.8354	0.631478	0.055654	0.00263781
LaF4	AP04d8	ok	235.385	4.32696		0.0371594	0.0182921	235.202	4.22617	0.012149	0.0375477	244.079	9.11156	0.0502453	0.0538413	206.356	124.888	0.248948	0.0546572	225.721	11.1229		1.2678	0.165641	10690	612.102	3.85918	0.299389	62.6138	3.86548	97.9665	7.09938		0.248948	0.0136068	0.0371594	0.000679723	26.9111	0.492259	0.0502453	0.00270527
LaF4	AP04d4	ok	236.302	4.57504		0.0379193	0.0191348	239.923	4.50807	0.0133492	0.0307769	268.032	8.19641	0.0632076	0.0522556	715.222	111.001	0.335733	0.0510412	293.933	13.1107		38.686	4.01758	10569.7	605.606	3.9151	0.258274	76.1641	4.88395	89.358	6.49823		0.335733	0.0171362	0.0379193	0.000725578	26.3718	0.504618	0.0632076	0.00330295
LaF4	AP04d3	ok	237.889	4.61319		0.0378146	0.0193237	239.273	4.54049	0.0132149	0.0338502	265.353	8.92554	0.0556512	0.0489407	438.479	108.923	0.294703	0.0496718	262.254	11.5457		1.60413	0.164887	10566.6	609.221	3.79729	0.250199	67.5608	4.20883	89.8833	6.45141		0.294703	0.0146384	0.0378146	0.00073072	26.4448	0.511012	0.0556512	0.00272361
LaF4	AP04d2	ok	239.632	5.03924		0.0380026	0.0209602	240.44	4.94875	0.0125035	0.0317953	251.156	7.93774	0.0537159	0.0548499	359.16	123.783	0.284338	0.0540352	254.093	12.22		2.08091	0.190496	10499.1	601.27	4.1178	0.270873	75.2241	4.68586	99.6927	7.30946		0.284338	0.0153642	0.0380026	0.000796543	26.314	0.551548	0.0537159	0.00294632
LaF4	AP04d9	ok	239.897	4.67418		0.0381871	0.0192971	241.586	4.57726	0.0123972	0.0362283	249.034	8.9687	0.05668	0.0568961	479.106	125.742	0.302017	0.0545764	267.975	12.9364		1.3239	0.185307	10569.8	603.265	3.5863	0.236578	57.2233	3.56587	87.8213	6.33275		0.302017	0.016483	0.0381871	0.0007369	26.1869	0.50533	0.05668	0.00322487
LaF4	AP04d10	ok	241.731	3.44448		0.0383839	0.014299	242.808	3.40825	0.0134619	0.0161538	270.28	4.33746	0.0546393	0.0274505	397.495	61.5326	0.297035	0.0267974	264.082	6.2505		6.70643	0.467432	10376.9	587.024	18.6161	1.21575	459.76	28.5452	389.864	27.9543		0.297035	0.00795977	0.0383839	0.000548854	26.0526	0.372527	0.0546393	0.00149987
LaF4	AP04d7	ok	242.179	5.21995		0.0387487	0.0214176	245.072	5.1524	0.0142024	0.033407	285.042	9.4578	0.0606579	0.0540405	627.125	116.473	0.320629	0.0527988	282.386	13.1001		3.49833	0.36484	9819.55	566.743	3.67758	0.243281	68.9135	4.32257	85.0519	6.13433		0.320629	0.0169288	0.0387487	0.000829906	25.8073	0.552732	0.0606579	0.00327798
LaF4	AP04d6	ok	242.853	5.49353		0.0389881	0.0224221	246.557	5.42624	0.0143529	0.0379359	288.042	10.8525	0.0633	0.0576001	718.325	122.292	0.344838	0.0561466	300.831	14.7246		6.73482	0.615197	10091.4	578.473	3.09506	0.204808	50.6968	3.15065	72.7061	5.42068		0.344838	0.0193615	0.0389881	0.000874196	25.6489	0.575103	0.0633	0.00364609
LaF4	AP04d1	ok	243.01	5.44326		0.038635	0.0224586	244.366	5.38766	0.0134076	0.0343615	269.196	9.19074	0.0555742	0.0445552	435.398	99.2157	0.299935	0.0471233	266.35	11.1005		4.78373	0.715235	10907.8	634.343	4.24729	0.281752	64.6789	4.0639	101.279	7.31636		0.299935	0.0141339	0.038635	0.000867688	25.8833	0.581303	0.0555742	0.00247612
LaF4	AP04d11	ok	243.671	4.41152		0.0386325	0.0181111	244.351	4.34411	0.0128536	0.0277177	258.145	7.11092	0.0533315	0.0419227	342.928	94.882	0.286416	0.0418093	255.735	9.49616		46.7714	2.3981	10648.8	606.681	7.09875	0.463433	130.427	8.10127	165.723	11.8307		0.286416	0.0119749	0.0386325	0.000699678	25.8849	0.468806	0.0533315	0.0022358
LaF4	AP04d5	ok	250.913	5.99885		0.04068	0.0238865	257.046	6.02194	0.0145673	0.0332479	292.314	9.65121	0.0706942	0.0429916	948.584	88.0001	0.398203	0.0428311	340.344	12.4619		92.3596	5.54049	10140.5	607.913	4.15149	0.281089	74.4727	4.75905	89.1682	6.56444		0.398203	0.0170555	0.04068	0.000971701	24.5821	0.58718	0.0706942	0.00303925
